# Supplementary material for: Two-dimensional metal-phase layered molybdenum disulfide for electrocatalytic hydrogen evolution reaction
Source: Royal Society of Chemistry journal article supplement (doi:10.1039/d2nr06184h), 2023-01-01
Supplement: d2nr06184h1.pdf [file d2nr06184h1.pdf]

## Supporting Information

### **Two-dimensional metal phase layered molybdenum disulfide for electrocatalytic hydrogen evolution reaction**

Hang Zhang,<sup>a</sup> Xuejian Xiao,<sup>a</sup> Hualan Xu,<sup>c</sup> Lei Wang,<sup>a</sup> Yuan Li,<sup>a</sup> Chuying Ouyang<sup>\*b</sup> and Shengliang Zhong<sup>\*a</sup>

<sup>a</sup>*Research Center for Ultrafine Powder Materials, College of Chemistry and Chemical Engineering, Jiangxi Normal University, Nanchang, 330022, P.R. China*

<sup>b</sup>*Department of Physics, Laboratory of Computational Materials Physics, Jiangxi Normal University, Nanchang, 330022, P.R. China.*

<sup>c</sup>*Analytical and Testing Center, Jiangxi Normal University, Nanchang, 330022, P.R. China.*

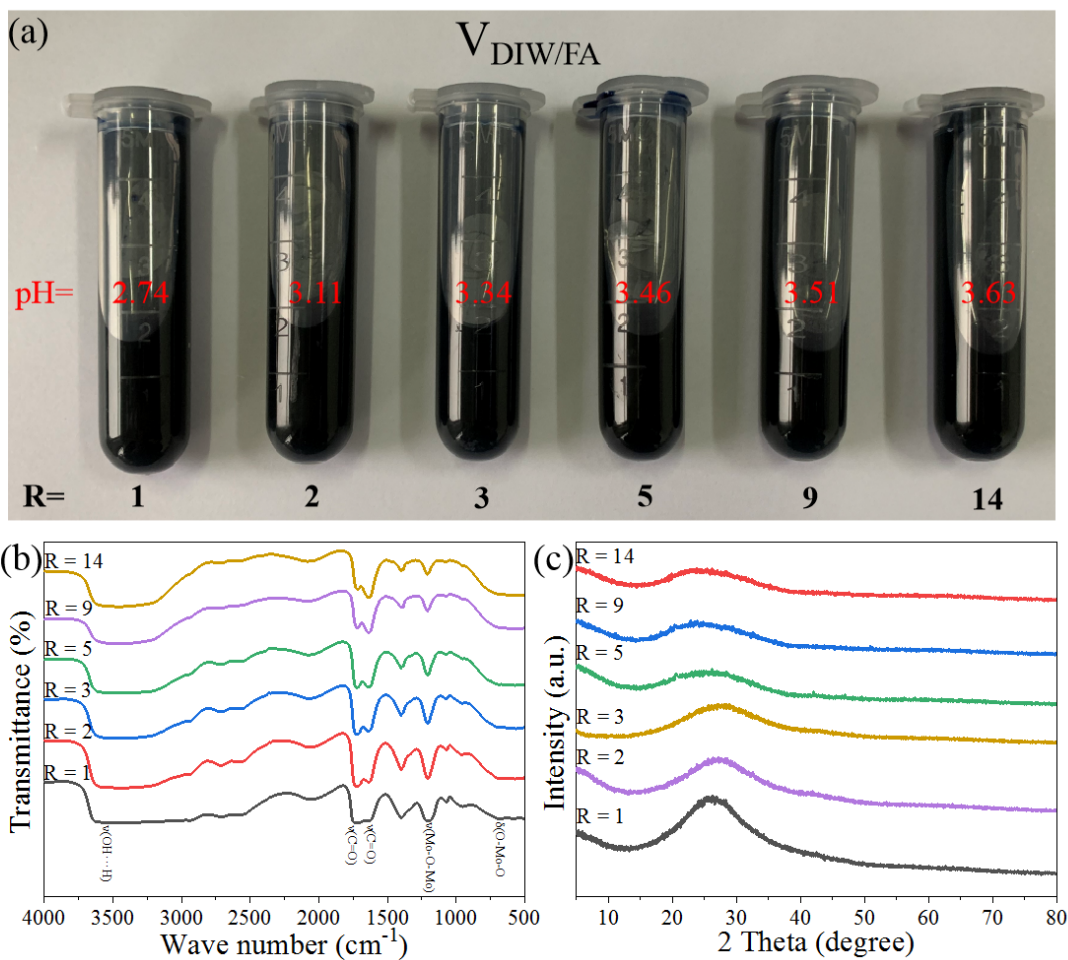

**Fig. S1.** Photos of MBS precursor solutions (a), FT-IR pattern (b) and XRD pattern (c) after 6 h at room temperature (25 °C) with different  $V_{\text{DIW/FA}}$  ( $R = 1, 2, 3, 5, 9$  and  $14$ ).

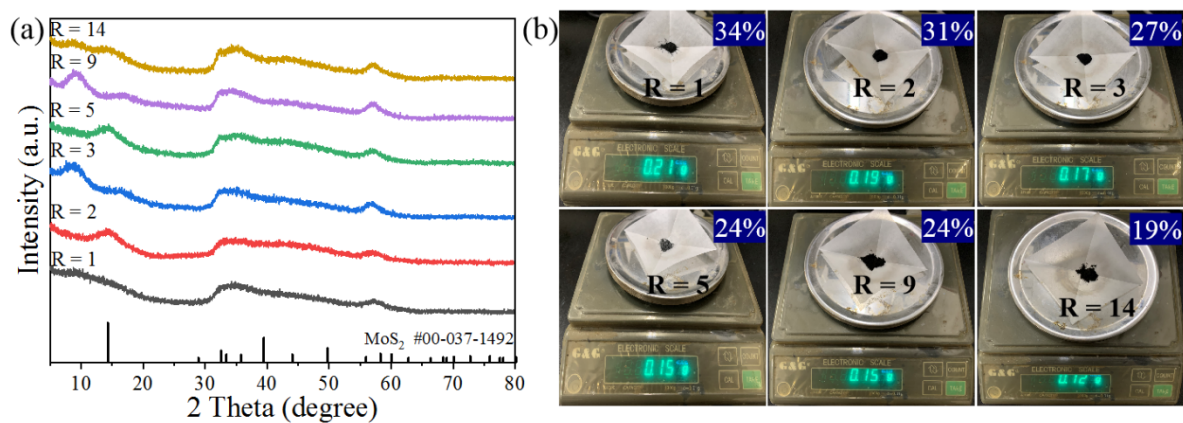

**Fig. S2.** XRD pattern (a) and yield (b) of products with different  $V_{\text{DIW/FA}}$  ( $R = 1, 2, 3, 5, 9$  and  $14$ ).

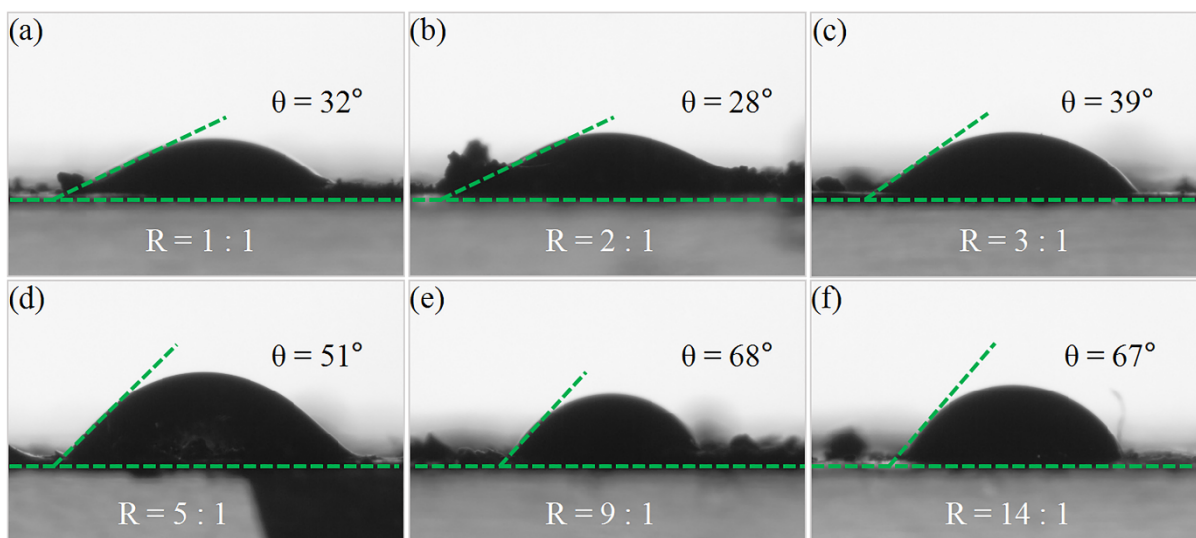

**Fig. S3.** Contact angle of products with different  $V_{DIW/FA}$  ( $R = 1, 2, 3, 5, 9$  and  $14$ ).

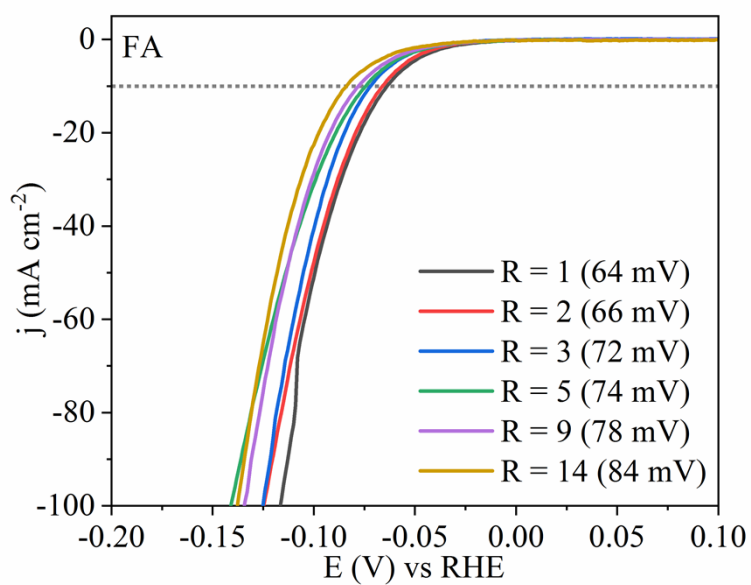

**Fig. S4.** LSV curves of MW-MoS<sub>2</sub> prepared with different  $V_{DIW/FA}$  ( $R = 1, 2, 3, 5, 9$  and  $14$ ).

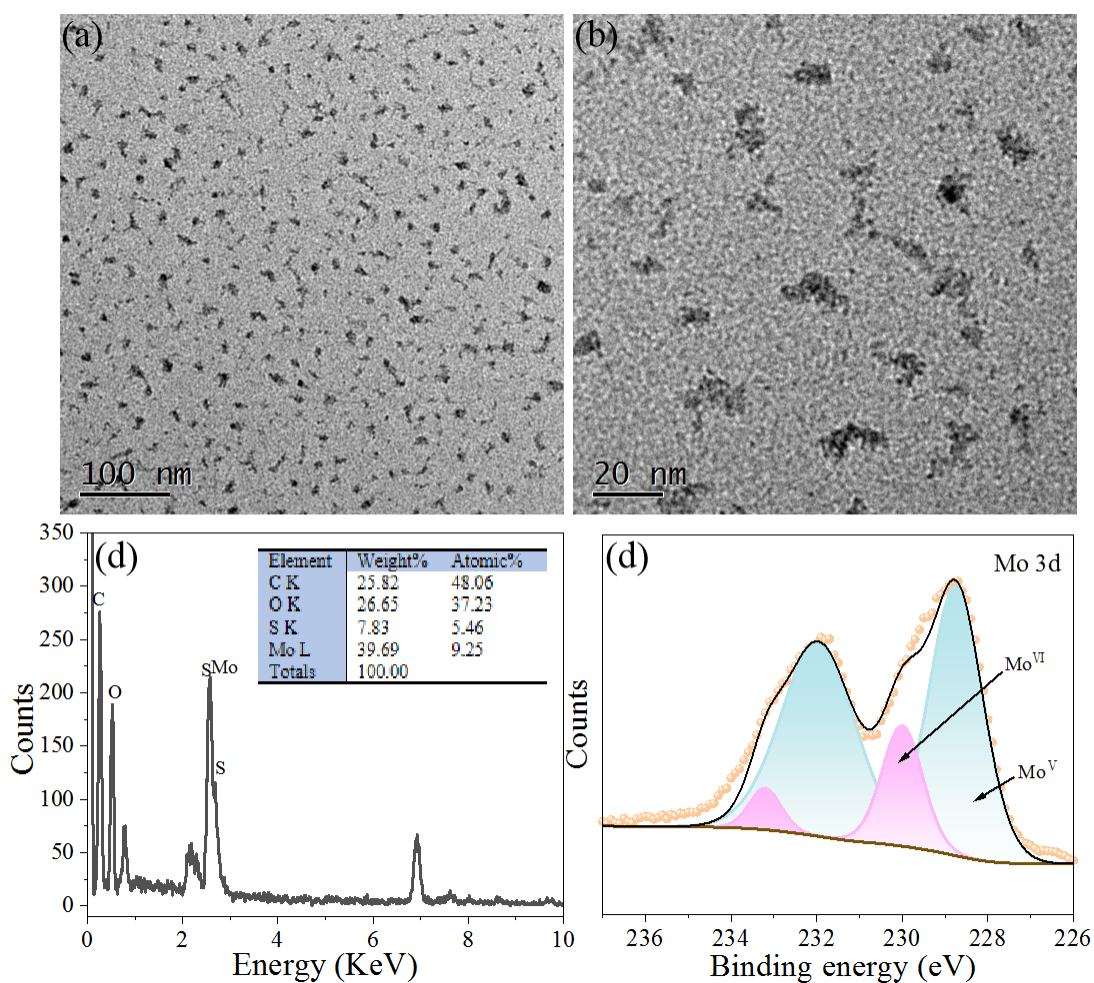

**Fig. S5.** TEM images (a-b), EDX pattern (c) and XPS spectra of Mo 3d (d) of MBS.

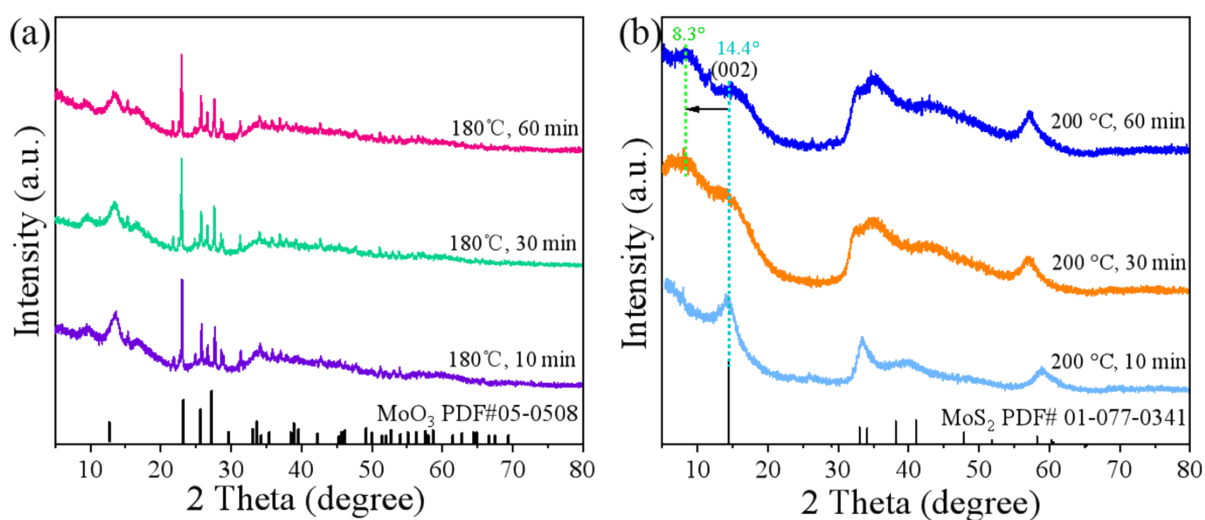

**Fig. S6.** XRD pattern of the corresponding products prepared at different reaction times and reaction temperatures.

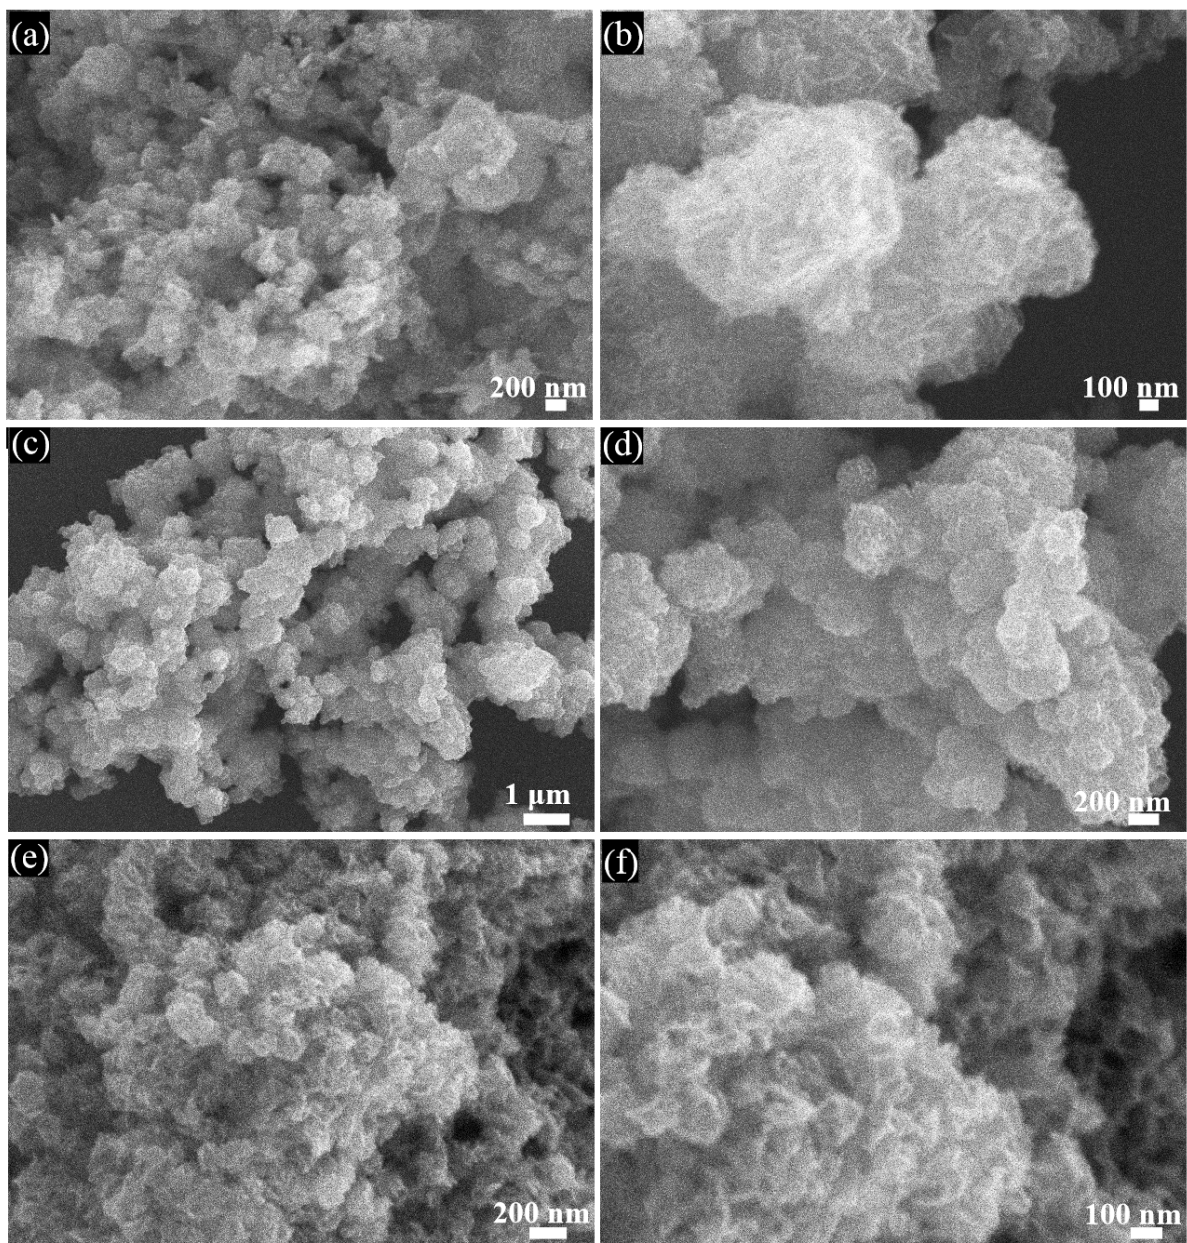

**Fig. S7.** SEM images of 2H-MoS<sub>2</sub> (a-b), HT-MoS<sub>2</sub> (c-d) and MW-MoS<sub>2</sub> (e-f).

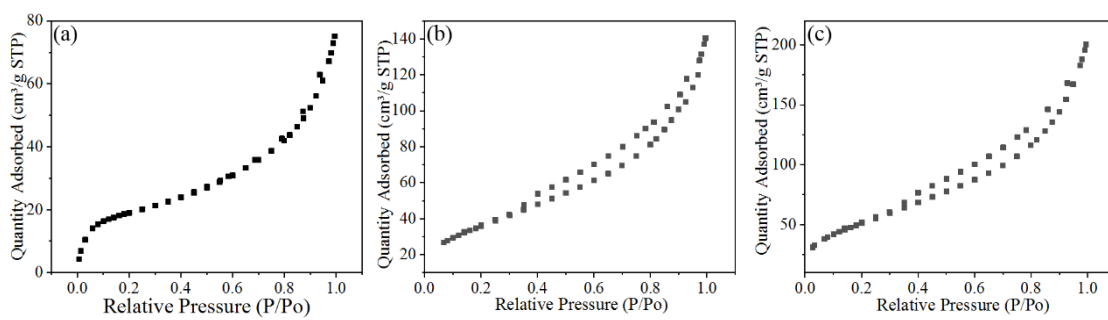

**Fig. S8.** S<sub>BET</sub> of 2H-MoS<sub>2</sub> (a), HT-MoS<sub>2</sub> (b) and MW-MoS<sub>2</sub> (c).

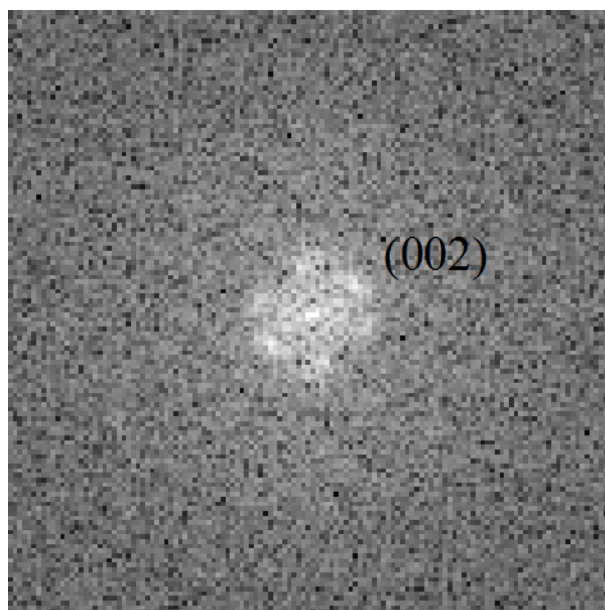

**Fig. S9.** SAED pattern of MW-MoS<sub>2</sub>.

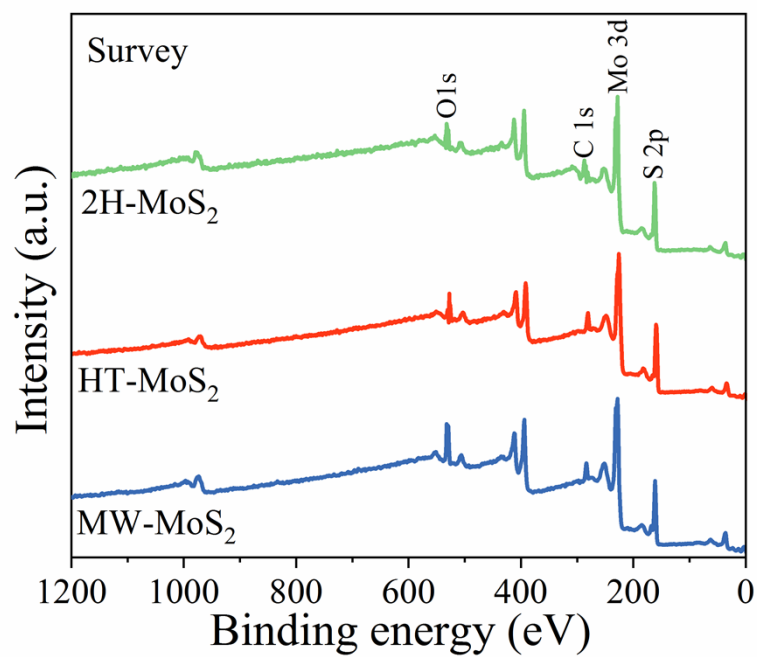

**Fig. S10.** Survey XPS patterns of 2H-MoS<sub>2</sub>, HT-MoS<sub>2</sub>, and MW-MoS<sub>2</sub>.

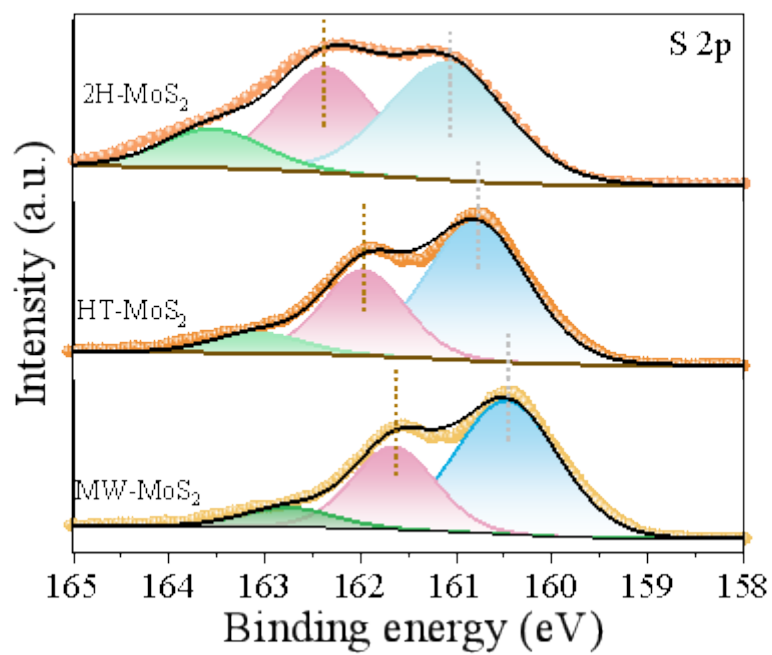

**Fig. S11.** XPS spectra of S 2p of 2H-MoS<sub>2</sub>, HT-MoS<sub>2</sub> and MW-MoS<sub>2</sub>.

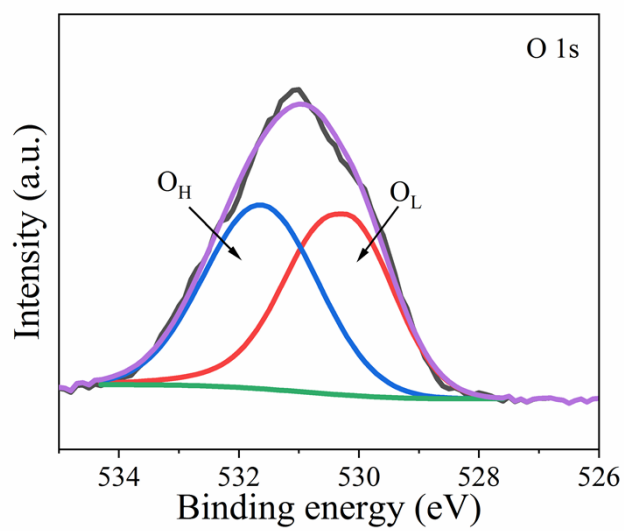

**Fig. S12.** XPS spectra of O 1s of MW-MoS<sub>2</sub>.

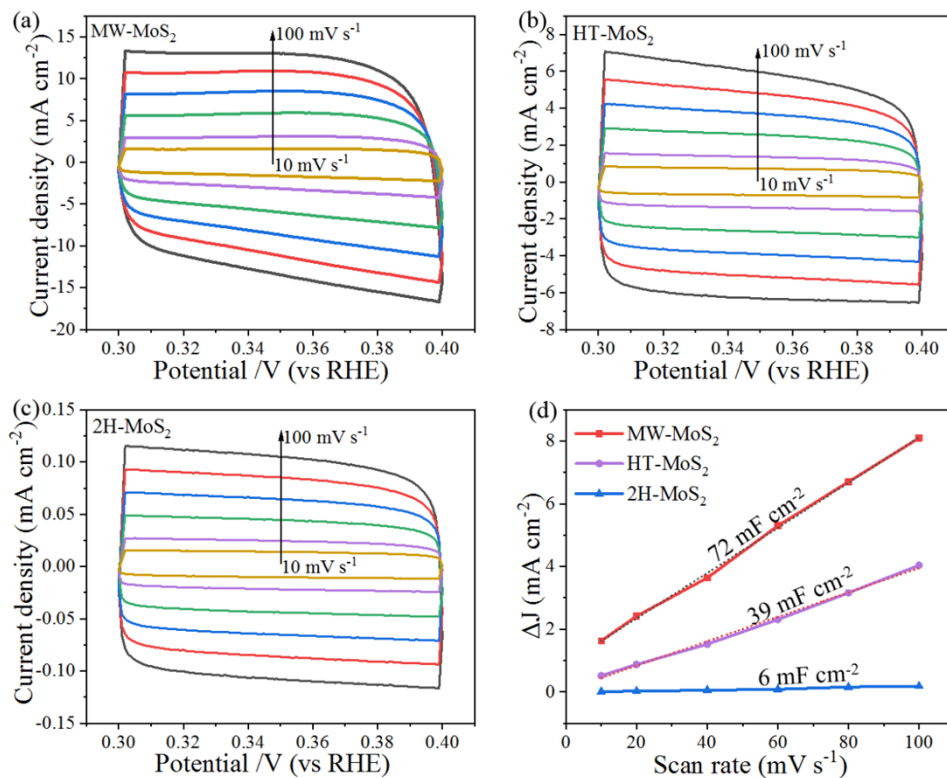

**Fig. S13.** CV plots of non-Faraday regions for MW-MoS<sub>2</sub> (a), HT-MoS<sub>2</sub> (b) and 2H-MoS<sub>2</sub> (c); the corresponding  $C_{dl}$  values were obtained at 0.35 V (vs RHE) and at different scan rates for the current density ( $\Delta j$ ) (d).

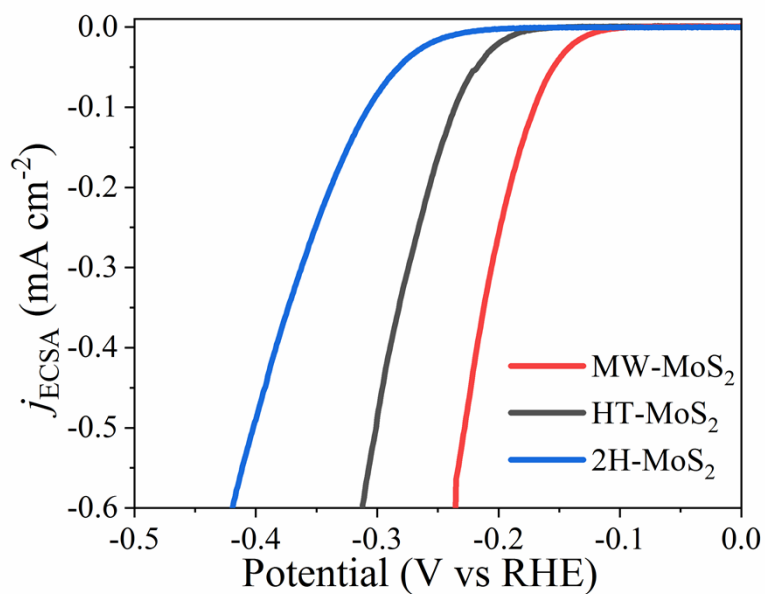

**Fig. S14.** HER polarization curves of MW-MoS<sub>2</sub>, HT-MoS<sub>2</sub> and 2H-MoS<sub>2</sub> catalysts normalized by the ECSA.



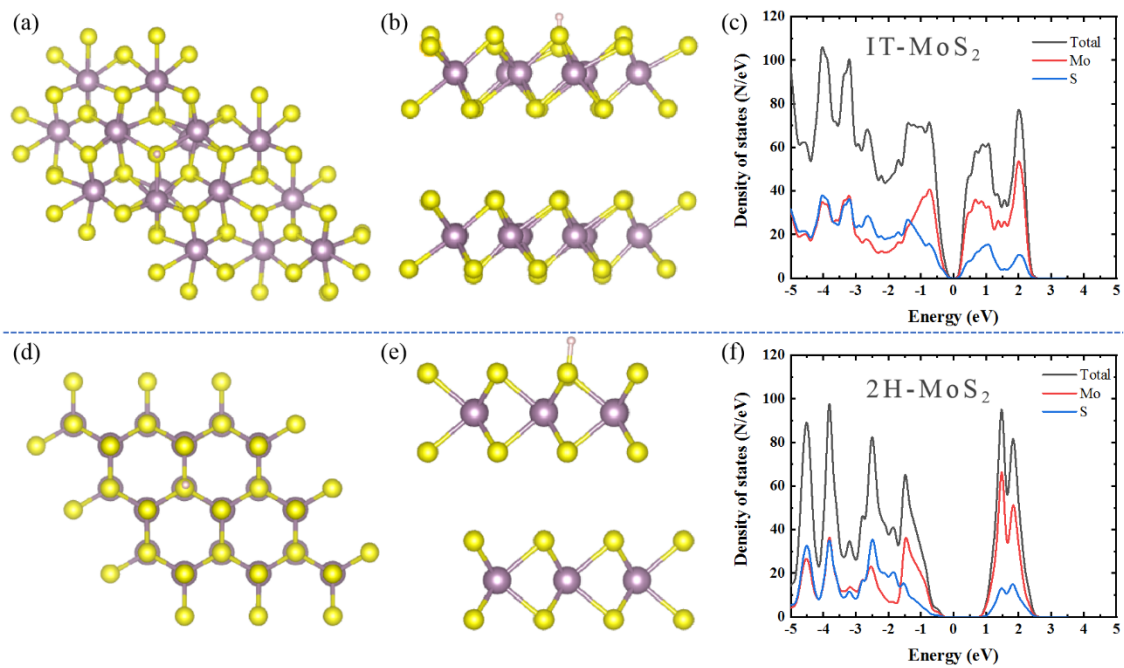

**Fig. S15.** Hydrogen absorption site model of 1T-MoS<sub>2</sub>: a: Top, b: Side, c: DOS; Hydrogen absorption site model of 2H-MoS<sub>2</sub>: d: Top, e: Side, f: DOS.

**Table S1.** Comparison of several existing methods for the preparation of 1T-MoS<sub>2</sub>.

| Material                         | Preparation method                 | Reaction temperature (°C) | Reaction time (h) | Reference                                                              |
|----------------------------------|------------------------------------|---------------------------|-------------------|------------------------------------------------------------------------|
| MW-MoS <sub>2</sub>              | microwave method                   | 200                       | 0.5               | This work                                                              |
| 1T-MoS <sub>2</sub> /CC          | hydrothermal route                 | 220                       | 24                | <i>Appl. Catal. B: Environ.</i> <b>2019</b> , <i>246</i> , 296-302.[1] |
| 1T-MoS <sub>2</sub>              | electrochemically intercalate      | —                         | 48                | <i>Nature Nanotech.</i> <b>2015</b> , <i>10</i> , 313-318.[2]          |
| M-MoS <sub>2</sub>               | hydrothermal process               | 200                       | 12                | <i>Nat. Commun.</i> <b>2016</b> , <i>7</i> , 10672.[3]                 |
| Li <sub>x</sub> MoS <sub>2</sub> | chemically embedded and exfoliated | —                         | 48                | <i>Nano Lett.</i> <b>2011</b> , <i>11</i> , 5111-5116.[4]              |
| 1T-MoS <sub>2</sub>              | chemically exfoliate               | 25                        | 168               | <i>Nat. Chem.</i> <b>2015</b> , <i>7</i> , 45-9.[5]                    |
| 1T@2H MoS <sub>2</sub>           | hydrothermal route                 | 200/220                   | 24                | <i>Catal. Sci. Technol.</i> <b>2017</b> , <i>7</i> , 5635-5643.[6]     |
| 1T-MoS <sub>2</sub>              | chemically embedded and exfoliated | —                         | 49                | <i>ACS Energy Lett.</i> <b>2018</b> , <i>3</i> , 7-13.[7]              |

**Table S2.** The content of elements by XPS.

| Sample              | Percent of Mo (%) | Percent of S (%) | Percent of O (%) |
|---------------------|-------------------|------------------|------------------|
| MW-MoS <sub>2</sub> | 33.12             | 62.58            | 4.30             |
| HT-MoS <sub>2</sub> | 30.40             | 66.23            | 3.37             |
| 2H-MoS <sub>2</sub> | 33.84             | 63.53            | 2.63             |

## Reference

- [1] Z. Liu, L. Zhao, Y. Liu, Z. Gao, S. Yuan, X. Li, N. Li, S. Miao, *Appl. Catal. B: Environ.* **246** (2019) 296.
- [2] M. Acerce, D. Voiry, M. Chhowalla, *Nature Nanotech.* **10** (2015) 313.
- [3] X. Geng, W. Sun, W. Wu, B. Chen, A. Al-Hilo, M. Benamara, H. Zhu, F. Watanabe, J. Cui, T.-p. Chen, *Nat. Commun.* **7** (2016) 10672.
- [4] G. Eda, H. Yamaguchi, D. Voiry, T. Fujita, M. Chen, M. Chhowalla, *Nano Lett.* **11** (2011) 5111.

- [5] D. Voiry, A. Goswami, R. Koppera, C. e Silva Cde, D. Kaplan, T. Fujita, M. Chen, T. Asefa, M. Chhowalla, *Nat. Chem.* 7 (2015) 45.
- [6] Y. Liu, Y. Xie, L. Liu, J. Jiao, *Catal. Sci. Technol.* 7 (2017) 5635.
- [7] N.H. Attanayake, A.C. Thenuwara, A. Patra, Y.V. Aulin, T.M. Tran, H. Chakraborty, E. Borguet, M.L. Klein, J.P. Perdew, D.R. Strongin, *ACS Energy Lett.* 3 (2018) 7.
